# Supplementary material
Source: PubMed Central journal article supplement (PMC6715373)
Supplement: jci-129-126363-s087.pdf [file jci-129-126363-s087.pdf]

# Supplemental figure 1

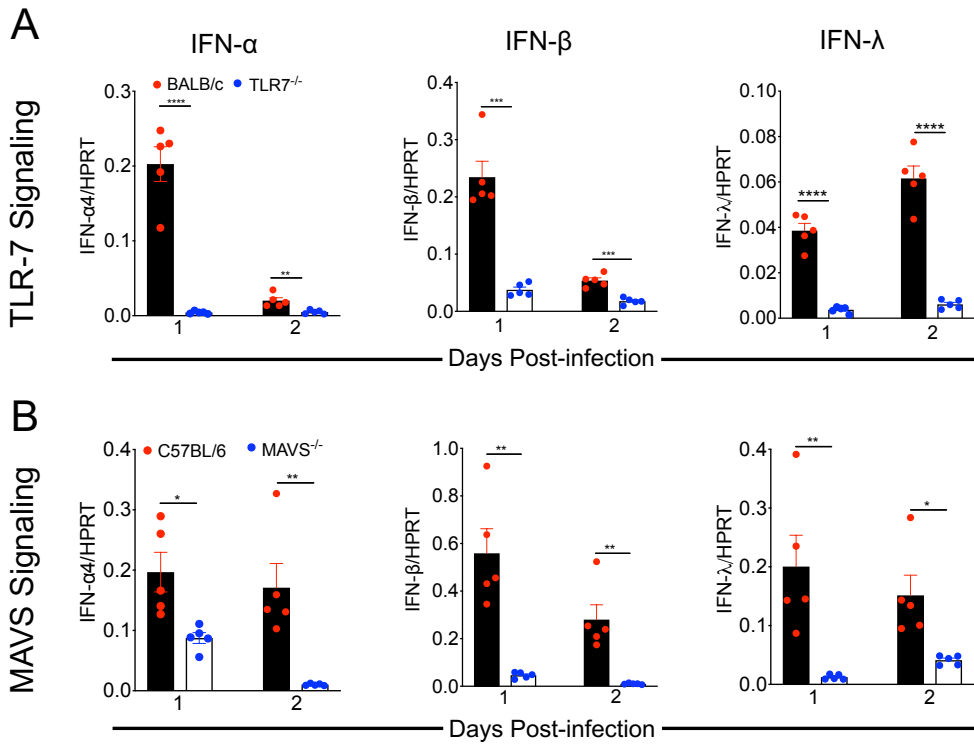

## Supplemental figure 2

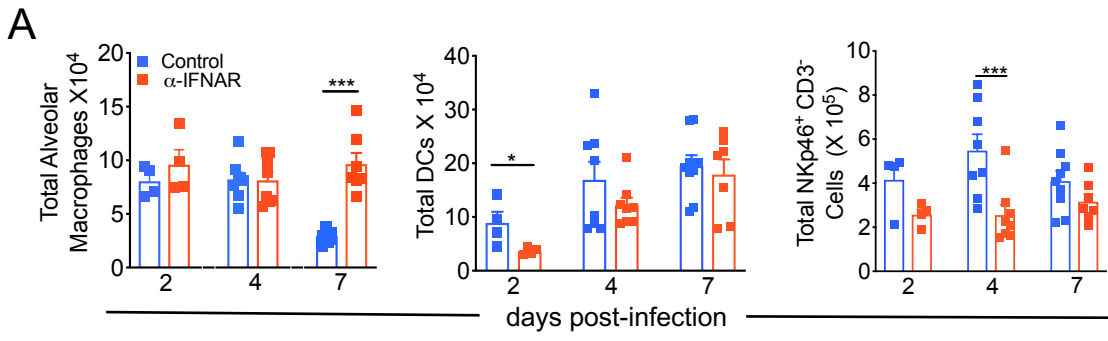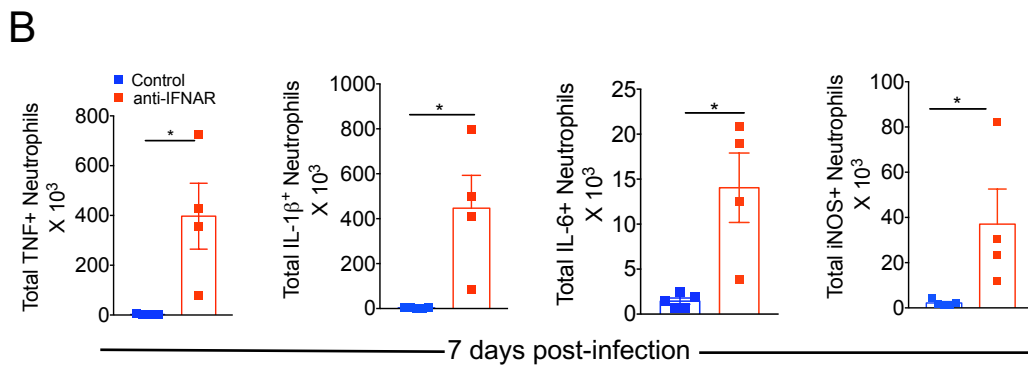

Supplemental figure 3

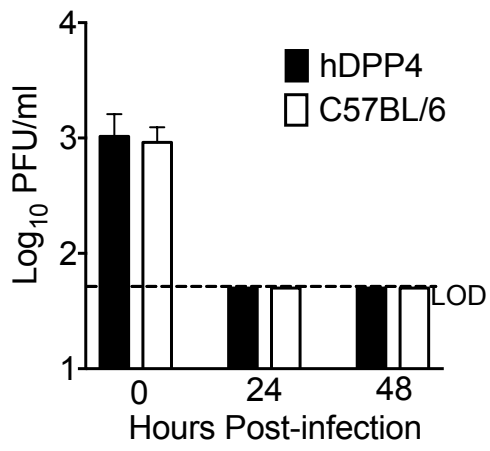

# Supplemental figure 4

A

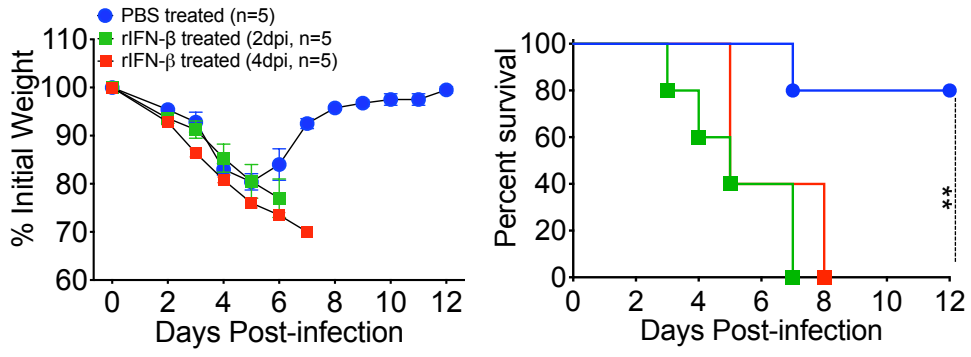

B

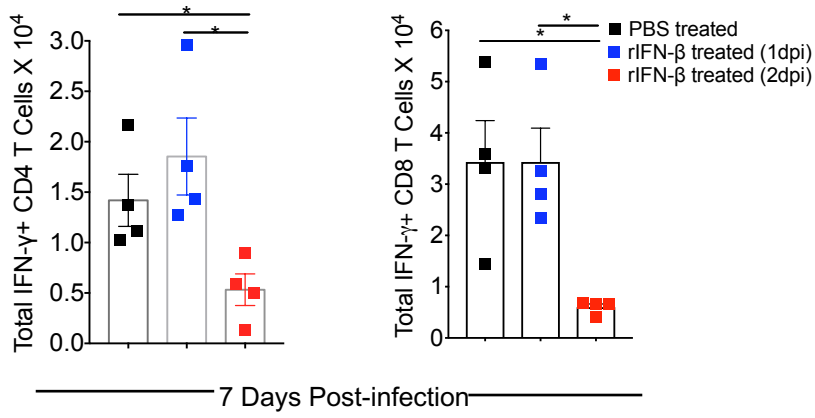

Supplemental Table 1. Upregulated genes in lungs from delayed rIFN- $\beta$ -treated mice compared to controls.

| <b>Genes Upregulated</b> | <b>Role</b>                                                |
|--------------------------|------------------------------------------------------------|
| Thbs1                    | Cell-matrix interaction and platelet aggregation           |
| Serpine1                 | Complement and Coagulation                                 |
| Orm1                     | Acute phase reactant                                       |
| Areg and Ereg            | MAPK and PI3K signaling                                    |
| IL11 and IL20            | B cell, Megakaryocyte and hematopoietic cell proliferation |
| Marco                    | Macrophage Scavenger Receptor                              |
| Cepbd                    | Inflammation and macrophage activation                     |
| Krt79                    | Epithelial cell integrity                                  |
